# Supplementary material for: Duguetia lanceolata A. St.-Hil. (Annonaceae) Essential Oil: Toxicity against Spodoptera frugiperda (J. E. Smith) (Lepidoptera: Noctuidae) and Selectivity for the Parasitoid Trichogramma pretiosum Riley (Hymenoptera: Trichogrammatidae)
Source: MDPI journal article supplement (doi:10.3390/agriculture13020488), 2023-02-18
Supplement: s1 [file s1]

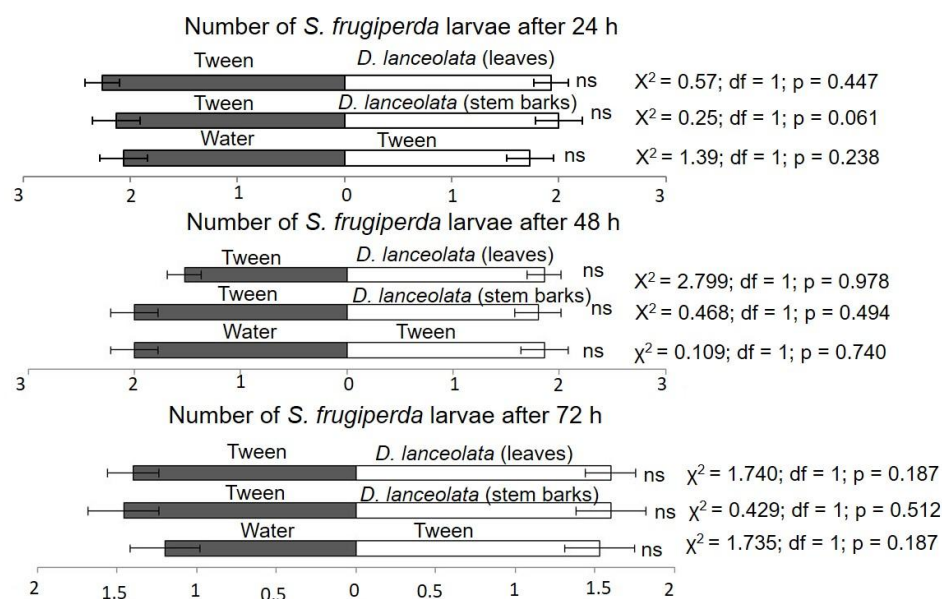

**Figure S1.** Food preference of caterpillars (number of caterpillars) of *Spodoptera frugiperda* by essential oils from the leaves and stem barks of *Duguetia lanceolata* in the free-choice test. Ns = non-significant ( $p \leq 0.05$ ) by  $\chi^2$  test.
